# Supplementary material for: Polyoxometalate modified pine cone biochar carbon for supercapacitor electrodes
Source: Royal Society of Chemistry journal article supplement (doi:10.1039/c6ta10382k), 2017-01-01
Supplement: c6ta10382k1.pdf [file c6ta10382k1.pdf]

## Supplementary Information

### Polyoxometalate Modified Pine Cone Biochar Carbon for Supercapacitor Electrodes

Matthew Genovese and Keryn Lian

Table S1: Average mass loading of each electrode sample tested

| <i>Sample</i>                              | <i>Average Electrode Mass Loading (mg cm<sup>-2</sup>)</i> |
|--------------------------------------------|------------------------------------------------------------|
| PC 2-1                                     | 1.80                                                       |
| PC 4-1                                     | 1.76                                                       |
| PC 5-1                                     | 1.75                                                       |
| PC 2-1-PMo <sub>12</sub>                   | 2.59                                                       |
| PC 4-1-PMo <sub>12</sub>                   | 2.80                                                       |
| PC 5-1-PMo <sub>12</sub>                   | 3.38                                                       |
| PC 5-1-PMo <sub>12</sub> -PW <sub>12</sub> | 3.33                                                       |

Table S2: Surface chemical composition of bare and PMo<sub>12</sub> modified PC Carbon samples determined by XPS analysis

|                                | <i>C (At. %)</i> | <i>O (At. %)</i> | <i>Mo (At. %)</i> |
|--------------------------------|------------------|------------------|-------------------|
| <i>PC 2-1</i>                  | 93.7             | 6.3              | --                |
| <i>PC 4-1</i>                  | 93.8             | 6.2              | --                |
| <i>PC 5-1</i>                  | 95.0             | 5.0              | --                |
| <i>PC 2-1-PMo<sub>12</sub></i> | 85.5             | 13.1             | 1.4               |
| <i>PC 4-1-PMo<sub>12</sub></i> | 82.1             | 15.0             | 2.9               |
| <i>PC 5-1-PMo<sub>12</sub></i> | 69.9             | 17.3             | 5.8               |

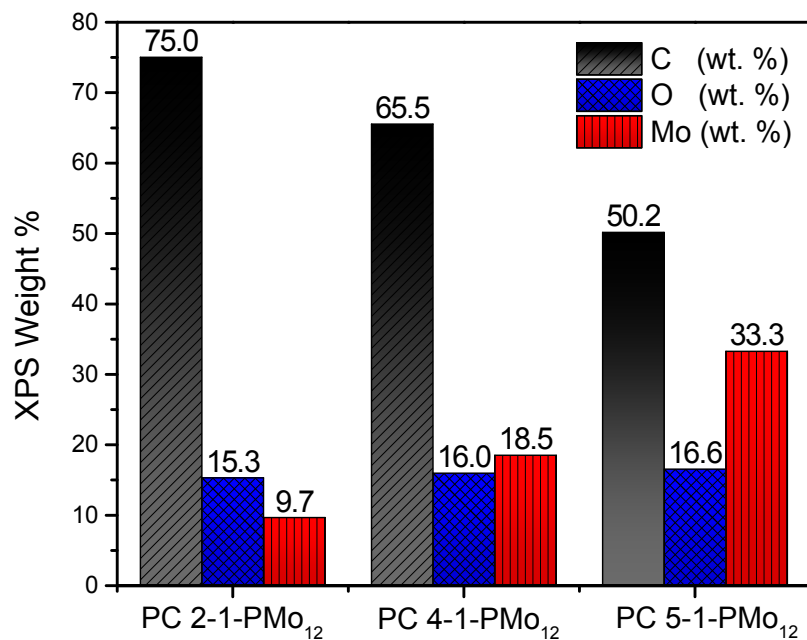

Figure S1: XPS surface chemical composition of PMo<sub>12</sub> modified PC Carbon in terms of weight %

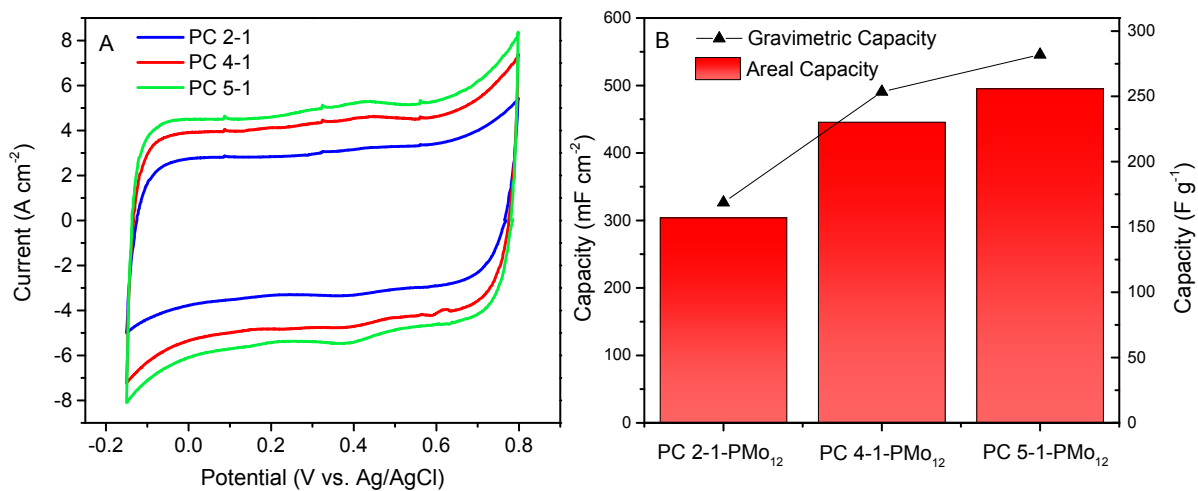

Figure S2: (A) Cyclic Voltammograms (CVs) of the unmodified PC 2-1, PC 4-1, and PC 5-1 carbon substrates at 10 mV s<sup>-1</sup>; (B) capacitance of the PC carbon substrates at 10 mV s<sup>-1</sup> in terms of both areal (primary axis) and gravimetric (secondary axis) values.

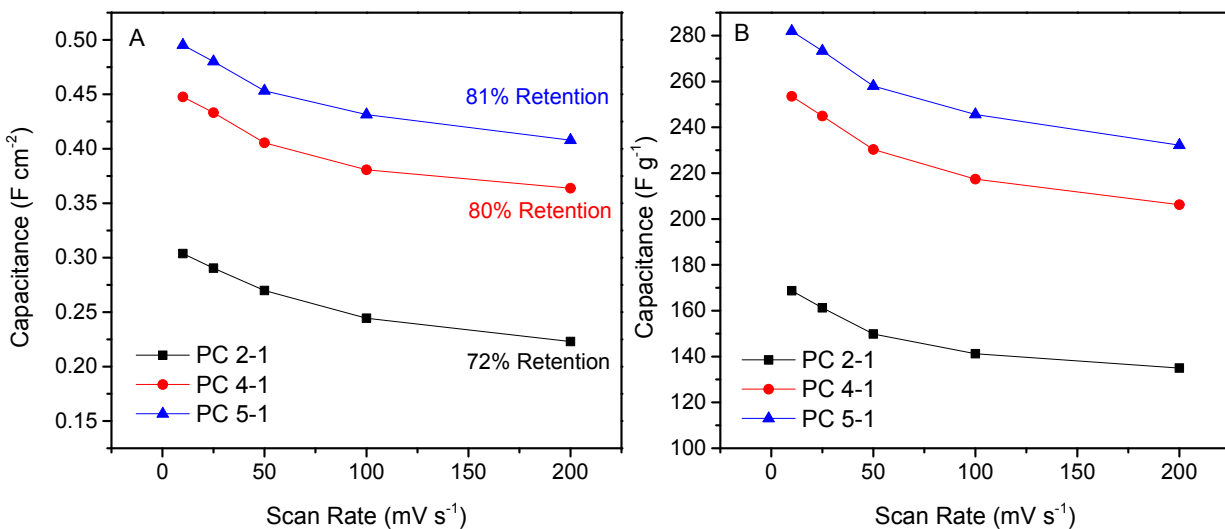

Figure S3: (A) Areal and (B) gravimetric capacitance vs. scan rate for the unmodified PC 2-1, PC 4-1, and PC 5-1 substrates.

Scheme S1:

Proton coupled electron transfer for  $\text{PMo}_{12}$  in acidic aqueous solutions:<sup>1</sup>

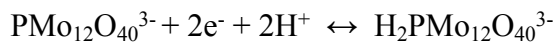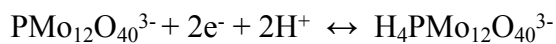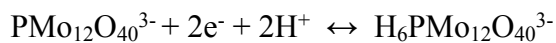

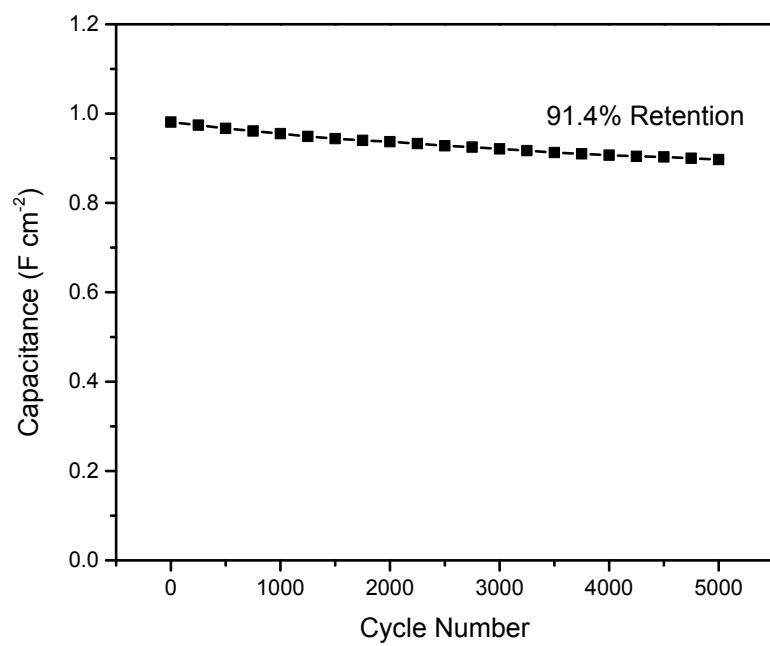

Figure S4: Capacity retention of PC 5-1-PMo<sub>12</sub> electrode after 5000 successive cycles at 50 mV s<sup>-1</sup>

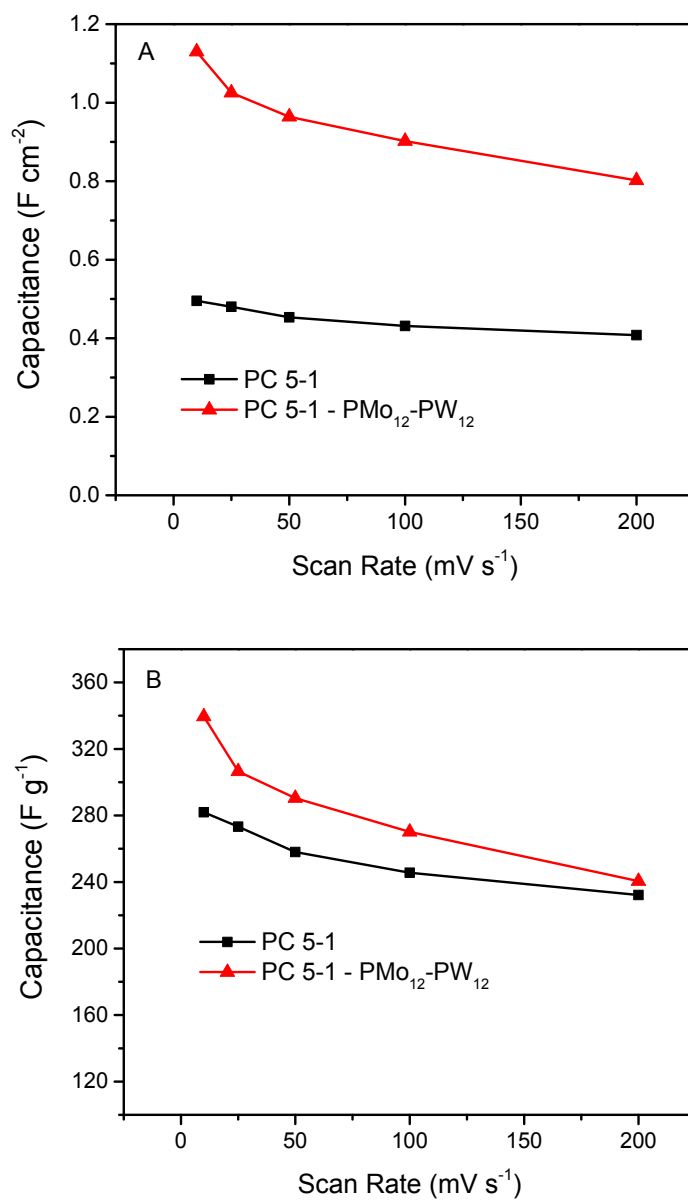

Figure S5: (A) Areal and (B) gravimetric capacitance of the bare and PMo<sub>12</sub>-PW<sub>12</sub> modified PC 5-1 substrate as a function of scan rate.

## *References*

1. M. Sadakane and E. Steckhan, *Chemical Reviews*, 1998, **98**, 219-238.
